# Supplementary material for: Synthesis of trapezohedral indium oxide nanoparticles with high-index {211} facets and high gas sensing activity
Source: Royal Society of Chemistry journal article supplement (doi:10.1039/c5cc02029h), 2015-01-01
Supplement: c5cc02029h1.pdf [file c5cc02029h1.pdf]

# Supporting Information

## Synthesis of Trapezohedral Indium Oxide Nanoparticles with High-Index {211} Facets and High Gas Sensing Activity

Xiguang Han,<sup>\*a</sup> Xiao Han,<sup>a</sup> Linqiang Sun,<sup>a</sup> Shengguang Gao,<sup>a</sup> Liang Li,<sup>a</sup>  
Qin Kuang,<sup>b</sup> Zhaoxiong Xie<sup>\*b</sup>, Chao Wang<sup>a</sup>

### 1. Experimental detail

#### 1.1 Materials

The synthesis of Trapezohedral Indium Oxide Nanoparticles was carried out using commercially available reagents. Indium (III) acetate ( $\text{In}(\text{OOC}_2\text{H}_5)_3$ ), trioctylamine (TOA, 98%), oleic acid (OA, 90%) were purchased from Alfa Aesar.

#### 1.2 Preparation of Trapezohedral $\text{In}_2\text{O}_3$ Nanoparticles:

In a typical synthesis, 1.35 mL OA and 3.0 mL trioctylamine were mixed to form a transparent solvent at room temperature, then 0.1 g Indium (III) acetate were add to the solvent and thoroughly dissolved under intense ultrasonic treatment. The resulting white solution was transferred into a glass tube with a length of 40 cm and 2.0 cm in diameter, and was directly placed in a veridical tube furnace that was already preheated to 320 °C. After the reaction for 30 min, the tube was taken out from the hot tube furnace and instantly added with ethanol. Finally, white products were collected by high-speed centrifugation. And then the samples before gas sensing were calcined at 400 °C for 6 h.

**1.3 Characterization.** The composition and phase of the as-prepared products were acquired by the powder X-ray diffraction (XRD) pattern using a Panalytical X-pert diffractometer with  $\text{CuK}\alpha$  radiation. The morphology and crystal structure of as-prepared products were observed by scanning electron microscopy (SEM, S4800), and high-resolution transmission electron microscopy (HRTEM, FEI Tecnai-F30) with an acceleration voltage of 300 kV. All TEM samples were prepared from depositing a drop of diluted suspensions in ethanol on a carbon film coated copper grid.

#### **1.4 Gas sensing test on trapezohedral $\text{In}_2\text{O}_3$ Nanoparticles:**

The gas-sensing tests were performed in a WS-30A measuring system (Zhengzhou Winsen Electronics Technology, China). In a typical test, a gas sensor was fabricated by coating a certain amount of  $\text{In}_2\text{O}_3$  paste (consisting of  $\text{In}_2\text{O}_3$  particles and the ethanol solvent) onto a ceramic tube that was previously mounted with gold electrodes and platinum conducting wires. A resistor wire coil was inserted in the tube as a heater to provide working temperatures from 200 to 500 °C by varying the heating current. The analyses were injected either directly into the chamber or, in the case of liquids like ethanol, onto a metal-plate heater in the test chamber and evaporated completely by heating. The gas-sensing capability of the sensor was defined as the ratio  $R_{\text{gas}}/R_{\text{air}}$ , where  $R_{\text{gas}}$  and  $R_{\text{air}}$  are the electrical resistance of the sensor in test gas and in air at the working temperature of about 350 °C, respectively.

## **2 The experimental results**

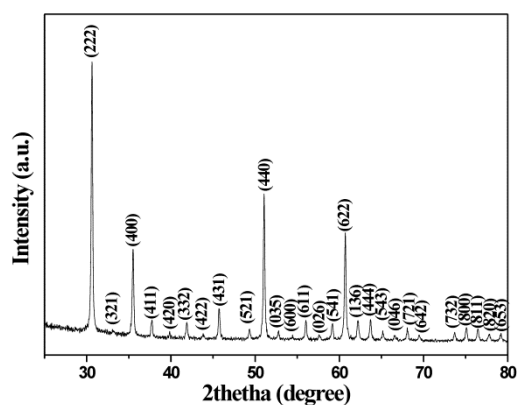

Fig. S1 the XRD pattern of the as-prepared products.

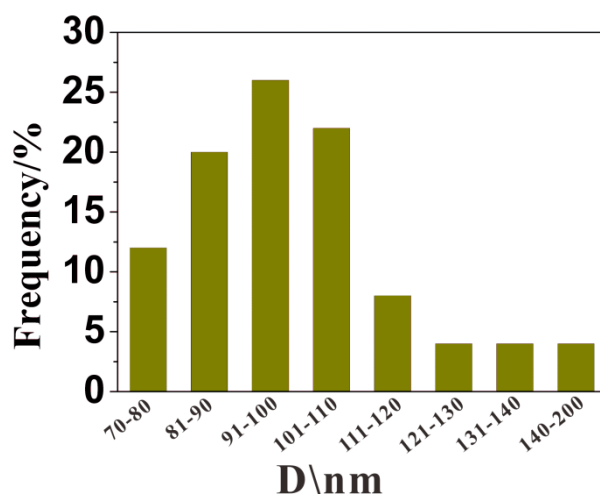

Fig. S2 the size distribution of the trapezohedraon-shaped  $\text{In}_2\text{O}_3$  particles

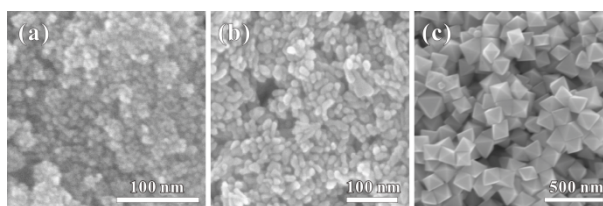

Fig. S3 The SEM images of  $\text{In}_2\text{O}_3$  products prepared by the thermal decomposition of Indium (III) acetate in (a) air at 320 °C, (b) pure TOA at 320 °C, (c) a mixture of OA and TOA at 360 °C.

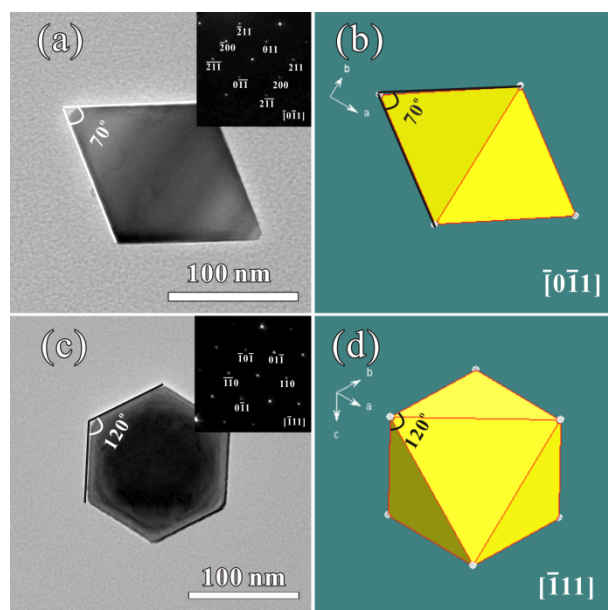

Fig. S4 (a) The TEM images of the individual octahedron-shaped  $\text{In}_2\text{O}_3$  NCs projected from  $[0\bar{1}1]$  direction, top-right inset shows corresponding SAED pattern. (b) Schematic model of an ideal octahedron enclosed  $\{111\}$  facets viewed along the  $[0\bar{1}1]$  direction, (c) TEM image of the same octahedron-shaped  $\text{In}_2\text{O}_3$  NCs particle viewed along  $[\bar{1}11]$  direction, inset: the corresponding SAED pattern, (d) schematic model of an ideal octahedron enclosed within  $\{111\}$  facets viewed along the  $[\bar{1}11]$  direction.
